# Supplementary material for: High‐throughput automated scoring of Ki67 in breast cancer tissue microarrays from the Breast Cancer Association Consortium
Source: PubMed Central journal article supplement (PMC4958735; doi:10.1002/cjp2.42), 2016-04-06
Supplement: CJP2-2-138-s001.pdf [file CJP2-2-138-s001.pdf]

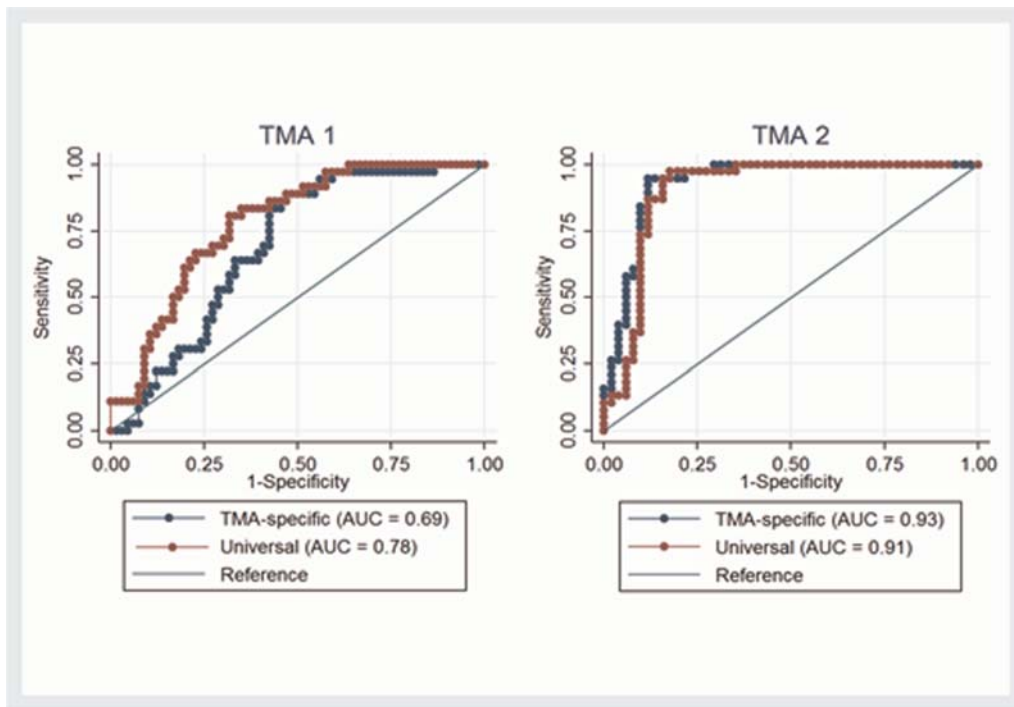

Supplementary Figure S1A (TMAs 1–15 & overall): Graphs comparing the ROC curves for the discriminatory accuracy of the automated continuous Ki67 scores against categories of the visual score by classifier type (TMA-specific and universal) among each of the 15 TMAs in the training set and overall.

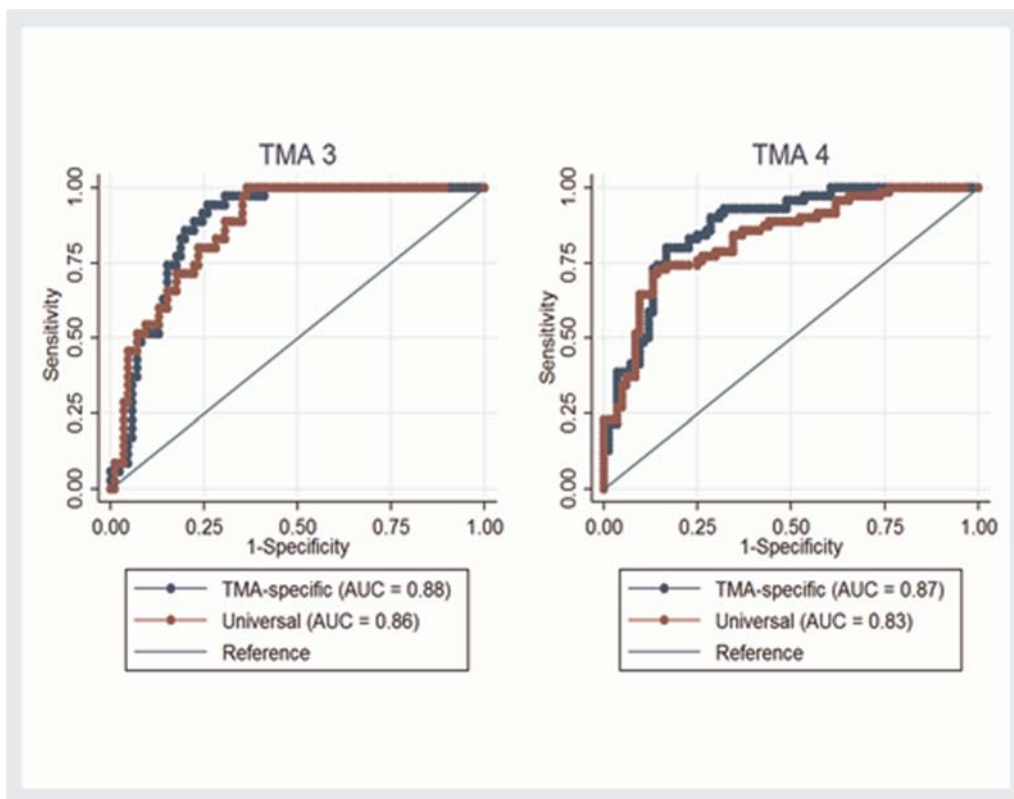

Supplementary Figure S1B (TMAs 1–15 & overall): Graphs comparing the ROC curves for the discriminatory accuracy of the automated continuous Ki67 scores against categories of the visual score by classifier type (TMA-specific and universal) among each of the 15 TMAs in the training set and overall.

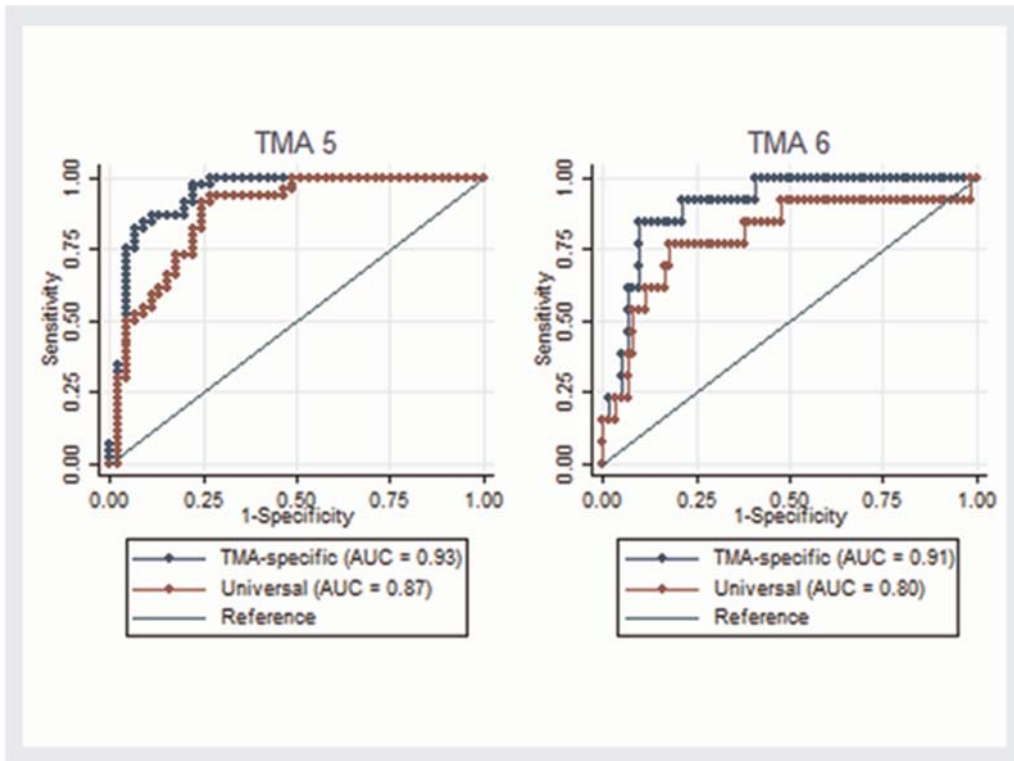

Supplementary Figure S1C (TMAs 1–15 & overall): Graphs comparing the ROC curves for the discriminatory accuracy of the automated continuous Ki67 scores against categories of the visual score by classifier type (TMA-specific and universal) among each of the 15 TMAs in the training set and overall.

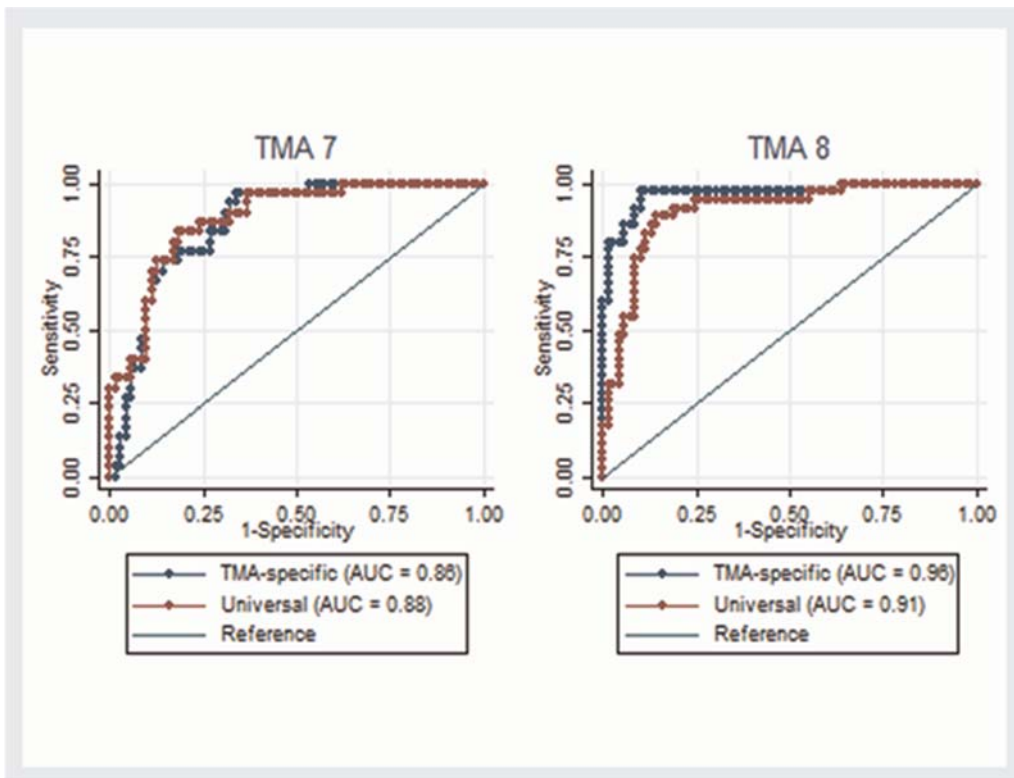

Supplementary Figure S1D (TMAs 1–15 & overall): Graphs comparing the ROC curves for the discriminatory accuracy of the automated continuous Ki67 scores against categories of the visual score by classifier type (TMA-specific and universal) among each of the 15 TMAs in the training set and overall.

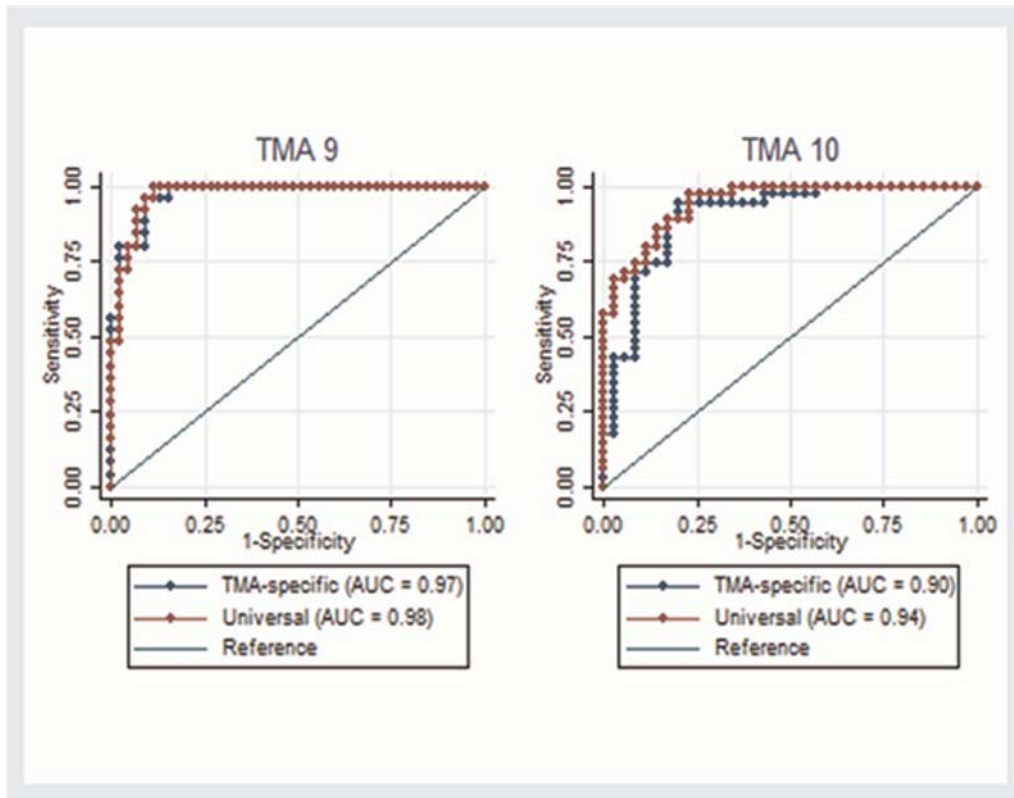

Supplementary Figure S1E (TMAs 1–15 & overall): Graphs comparing the ROC curves for the discriminatory accuracy of the automated continuous Ki67 scores against categories of the visual score by classifier type (TMA-specific and universal) among each of the 15 TMAs in the training set and overall.

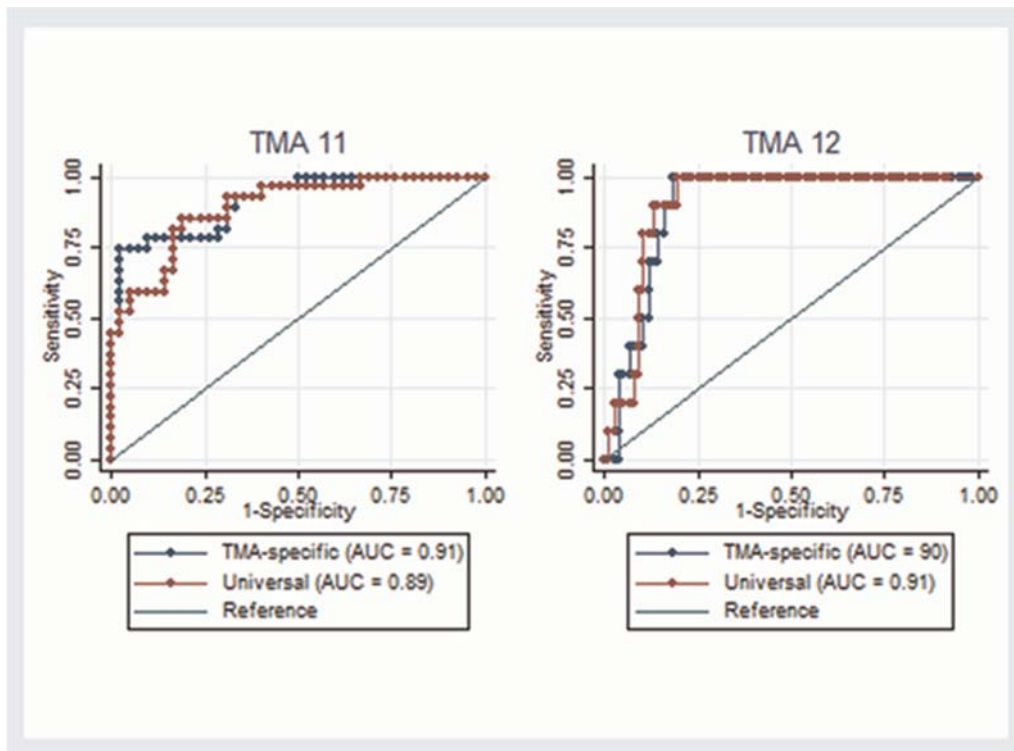

Supplementary Figure S1F (TMAs 1–15 & overall): Graphs comparing the ROC curves for the discriminatory accuracy of the automated continuous Ki67 scores against categories of the visual score by classifier type (TMA-specific and universal) among each of the 15 TMAs in the training set and overall.

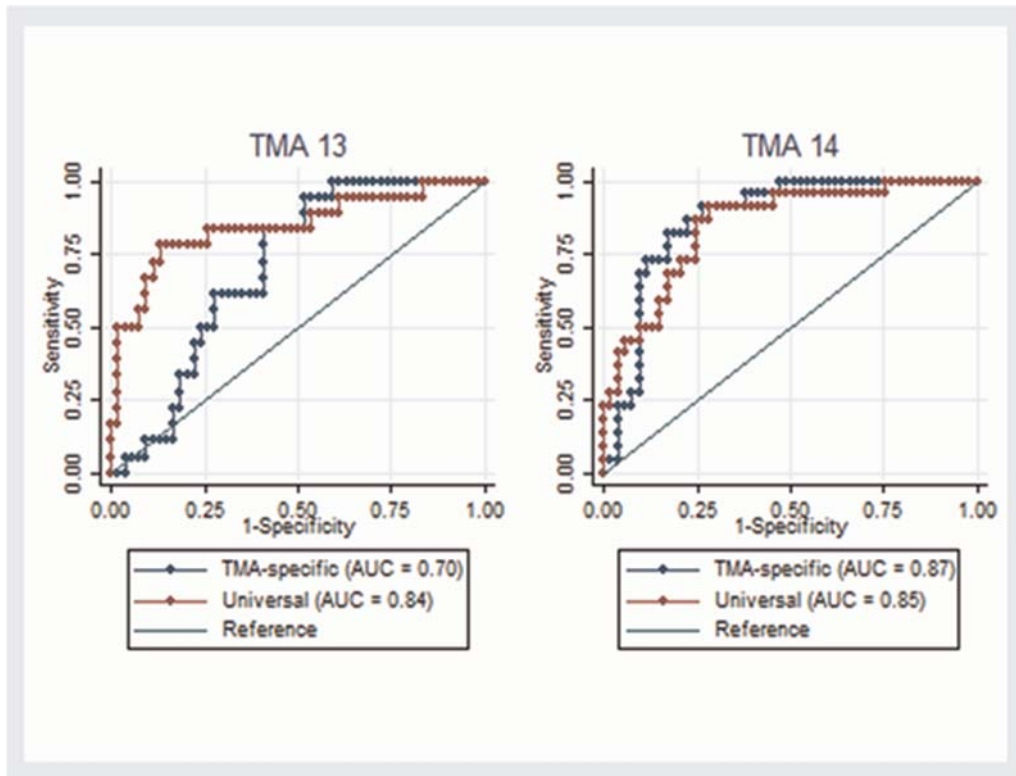

Supplementary Figure S1G (TMAs 1–15 & overall).: Graphs comparing the ROC curves for the discriminatory accuracy of the automated continuous Ki67 scores against categories of the visual score by classifier type (TMA-specific and universal) among each of the 15 TMAs in the training set and overall.

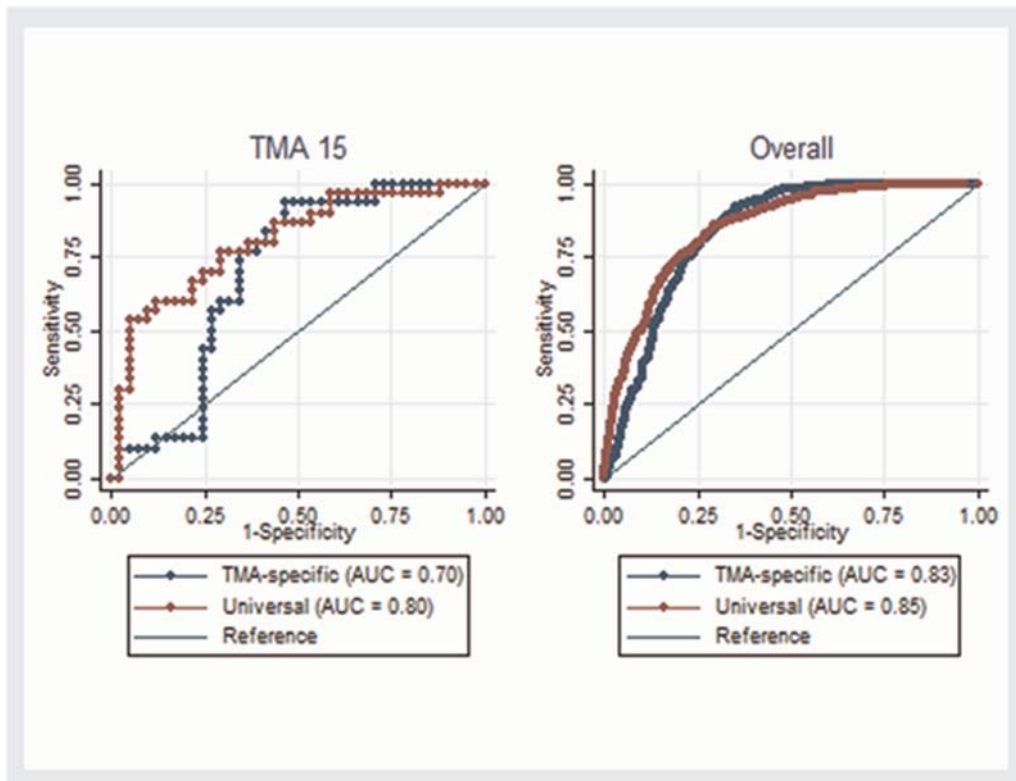

Supplementary Figure S1H (TMAs 1–15 & overall).: Graphs comparing the ROC curves for the discriminatory accuracy of the automated continuous Ki67 scores against categories of the visual score by classifier type (TMA-specific and universal) among each of the 15 TMAs in the training set and overall.
